# Supplementary material
Source: HighWire-hosted journal article supplement (https://ijgc.bmj.com/highwire/filestream/28634/field_highwire_adjunct_files/1/ijgc-2022-004224supp002_data_supplement.pdf)

**Supplementary figure 2: Consort Diagram**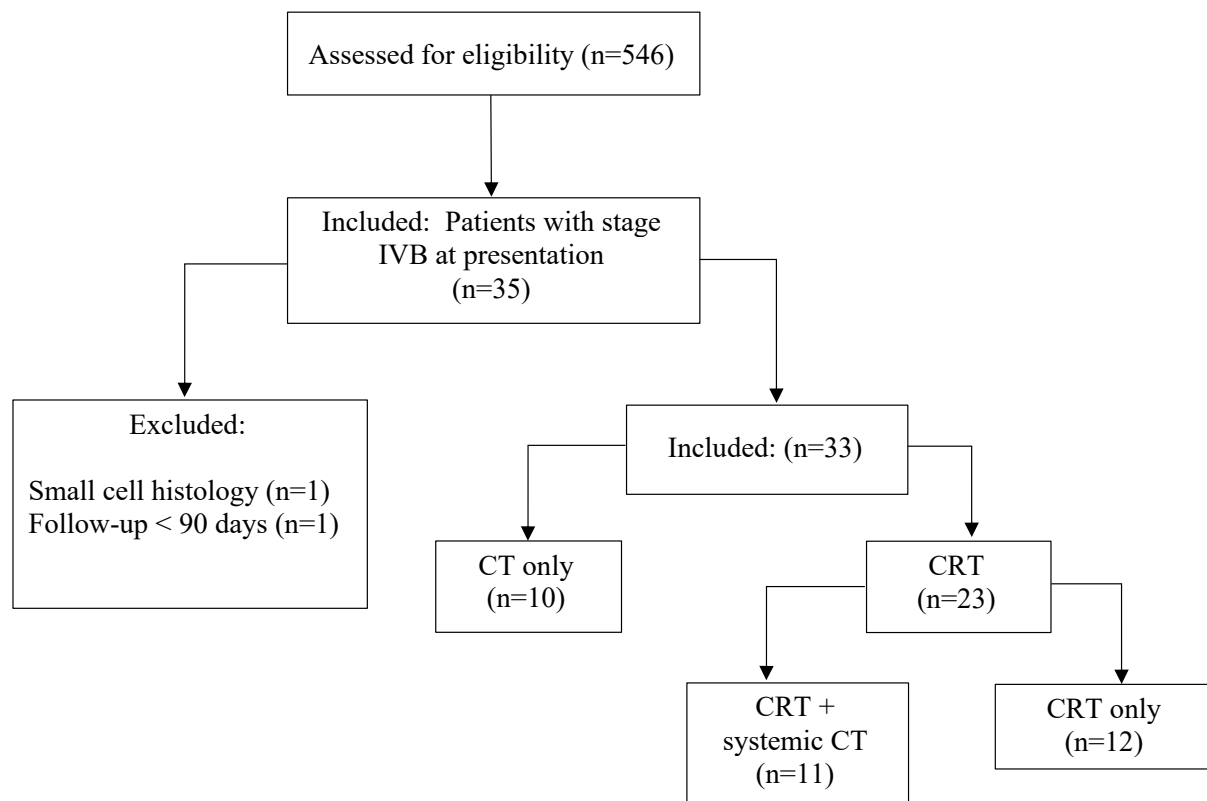

Supplement: ijgc-2022-004224supp002_data_supplement.pdf [file ijgc-2022-004224supp002_data_supplement.pdf]
